# Supplementary material for: Efficient and Stable Fiber Dye-Sensitized Solar Cells Based on Solid-State Li-TFSI Electrolytes with 4-Oxo-TEMPO Derivatives
Source: MDPI journal article supplement (doi:10.3390/nano12132309), 2022-07-05
Supplement: s1 [file s1]

Supplementary Materials

# Efficient and Stable Fiber Dye-Sensitized Solar Cells Based on Solid-State Li-TFSI Electrolytes with 4-Oxo-TEMPO Derivatives

Pyeongje An <sup>1,2,†</sup>, Jae Ho Kim <sup>1,†</sup>, Myeonghwan Shin <sup>3,†</sup>, Sukyeong Kim <sup>1</sup>, Sungok Cho <sup>1</sup>, Chaehyun Park <sup>1,2</sup>, Geonguk Kim <sup>1,2</sup>, Hyung Woo Lee <sup>2,4,\*</sup>, Jin Woo Choi <sup>1,\*</sup>, Chuljin Ahn <sup>3,\*</sup> and Myungkwan Song <sup>1,\*</sup>

<sup>1</sup> Department of Energy & Electronic Materials, Korea Institute of Materials Science (KIMS), Changwon 51508, Gyeongsangnam-do, Korea; apj6669@kims.re.kr (P.A.); jho83@kims.re.kr (J.H.K.); chae119@kims.re.kr (S.K.); choso1225@kims.re.kr (S.C.); tlsaughks98@naver.com (C.P.); rndndndnr2@kims.re.kr (G.K.)

<sup>2</sup> Department of Nano Fusion Technology, Pusan National University, Busan 46241, Korea

<sup>3</sup> Department of Biology and Chemistry, Changwon National University, Changwon 51140, Gyeongsangnam-do, Korea; a463489@kims.re.kr

<sup>4</sup> Department of Nanoenergy Engineering and Research Center of Energy Convergence Technology, Pusan National University, Busan 46241, Korea

\* Correspondence: lhw2010@pusan.ac.kr (H.W.L.); jinwoo.choi@kims.re.kr (J.W.C.); cahn@changwon.ac.kr (C.A.); smk1017@kims.re.kr (M.S.)

† These authors contributed equally to this work.

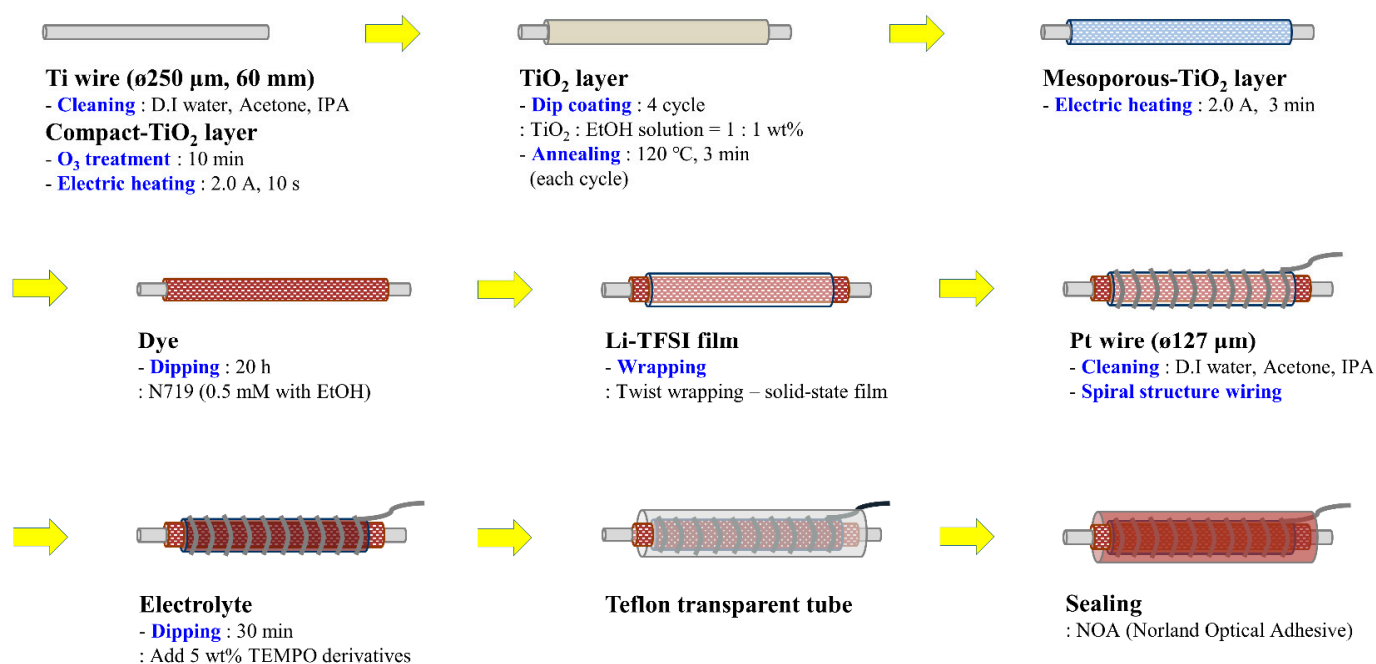

**Figure S1.** Fabrication process of TEMPO based SS-FDSSCs.

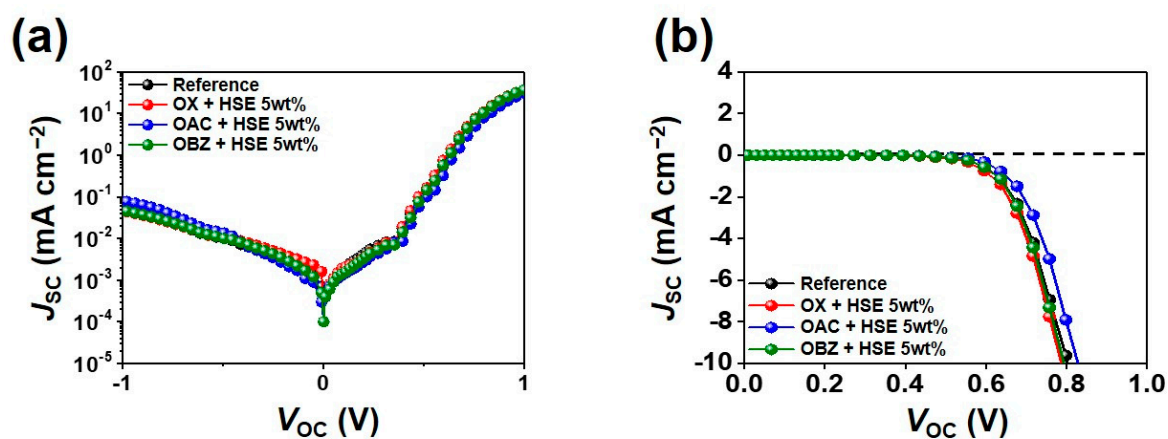

**Figure S2.**  $J$ - $V$  characteristics of TEMPO-based SS-FDSSCs in the dark condition: (a) typical semi-logarithmic scale from  $-1$  V to  $+1$  V and (b) normal scale.

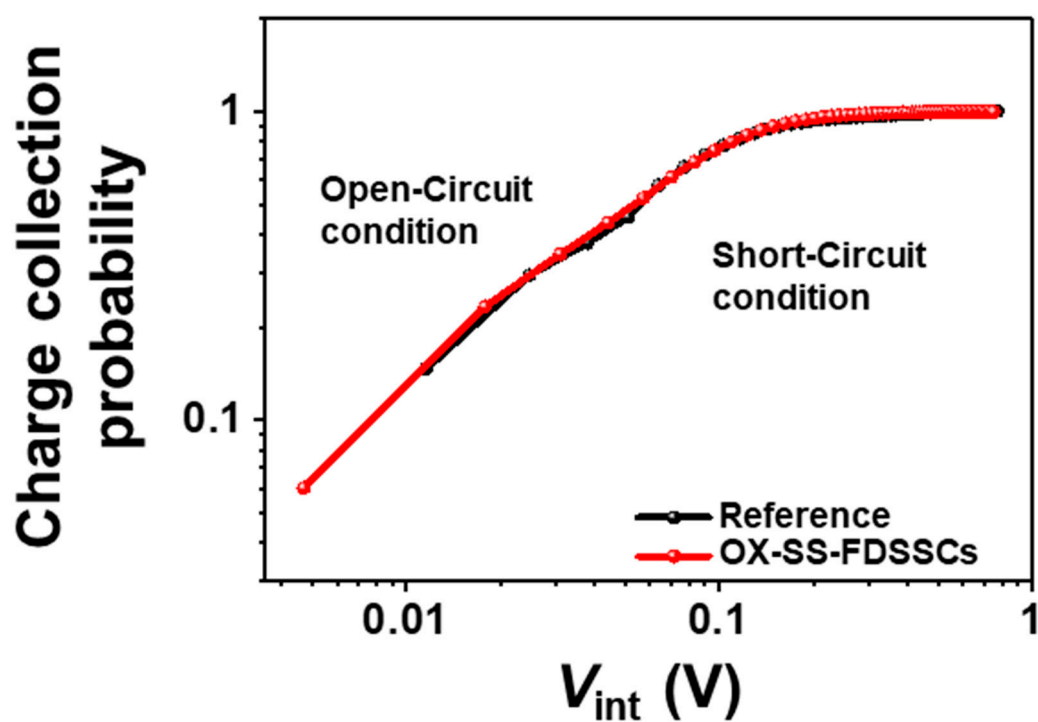

**Figure S3.** Characterization and photovoltaic properties of TEMPO-SS-FDSSCs devices: charge collection probability (or) normalized photocurrent with saturated photocurrent as a function of internal voltage.

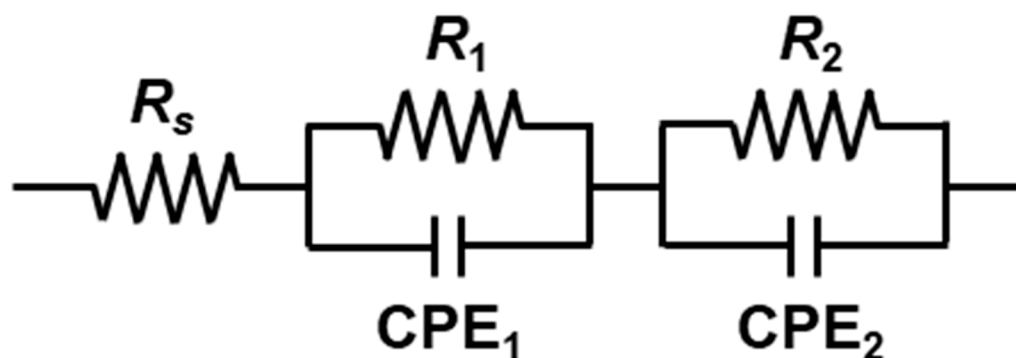

Figure S4. The equivalent circuit for EIS analysis.

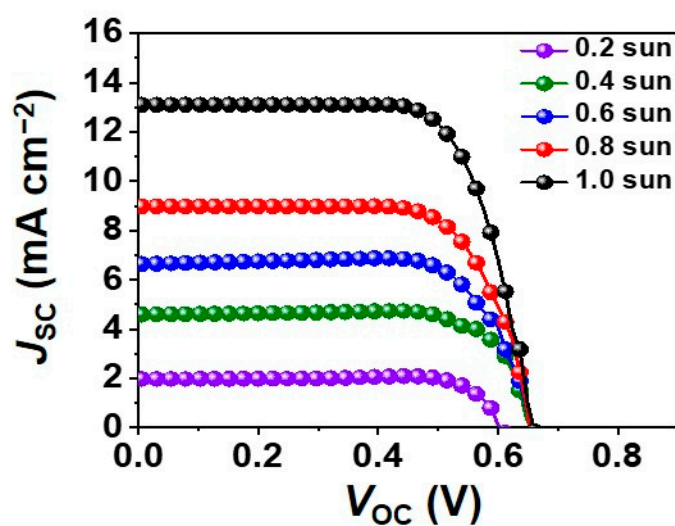

Figure S5. The  $J$ - $V$  curves of the OX enhanced SS-FDSSC under various illuminations of 0.2 to 1.0 sun.

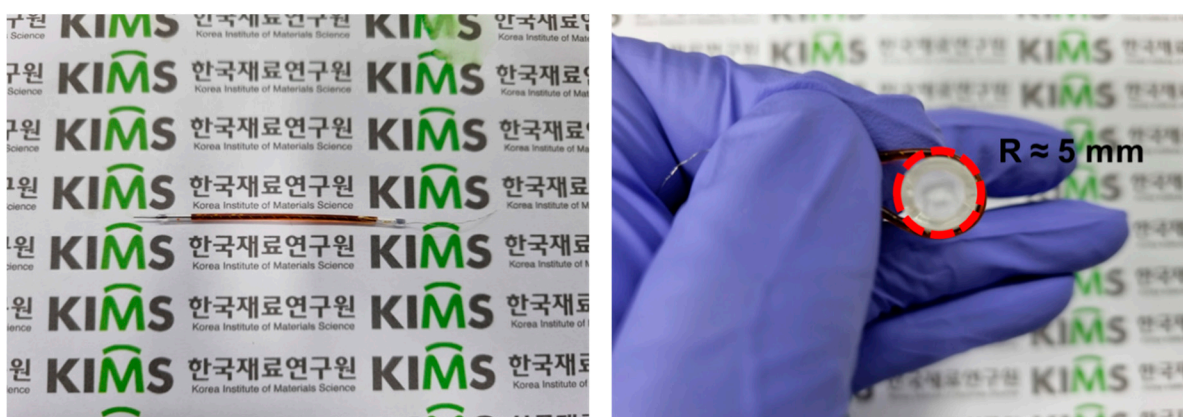

Figure S6. Photographs showing bending test for the OX-enhanced SS-FDSSC.

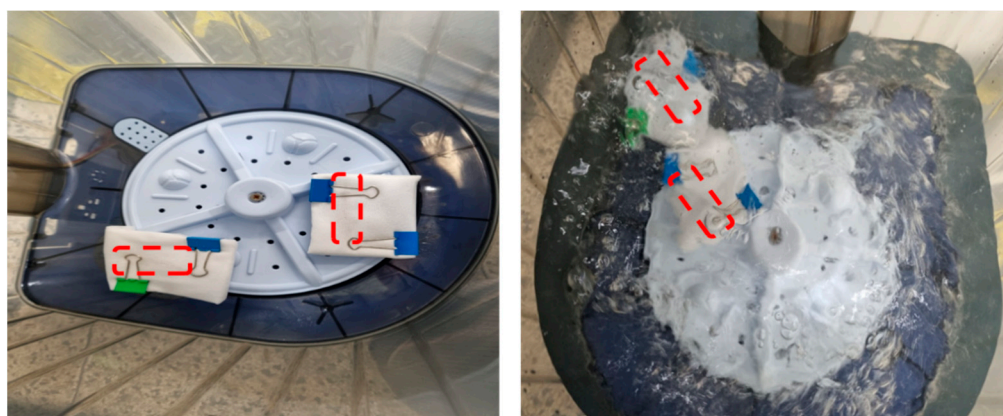

**Figure S7.** Photographs showing washing test for the OX-enhanced SS-FDSSC.

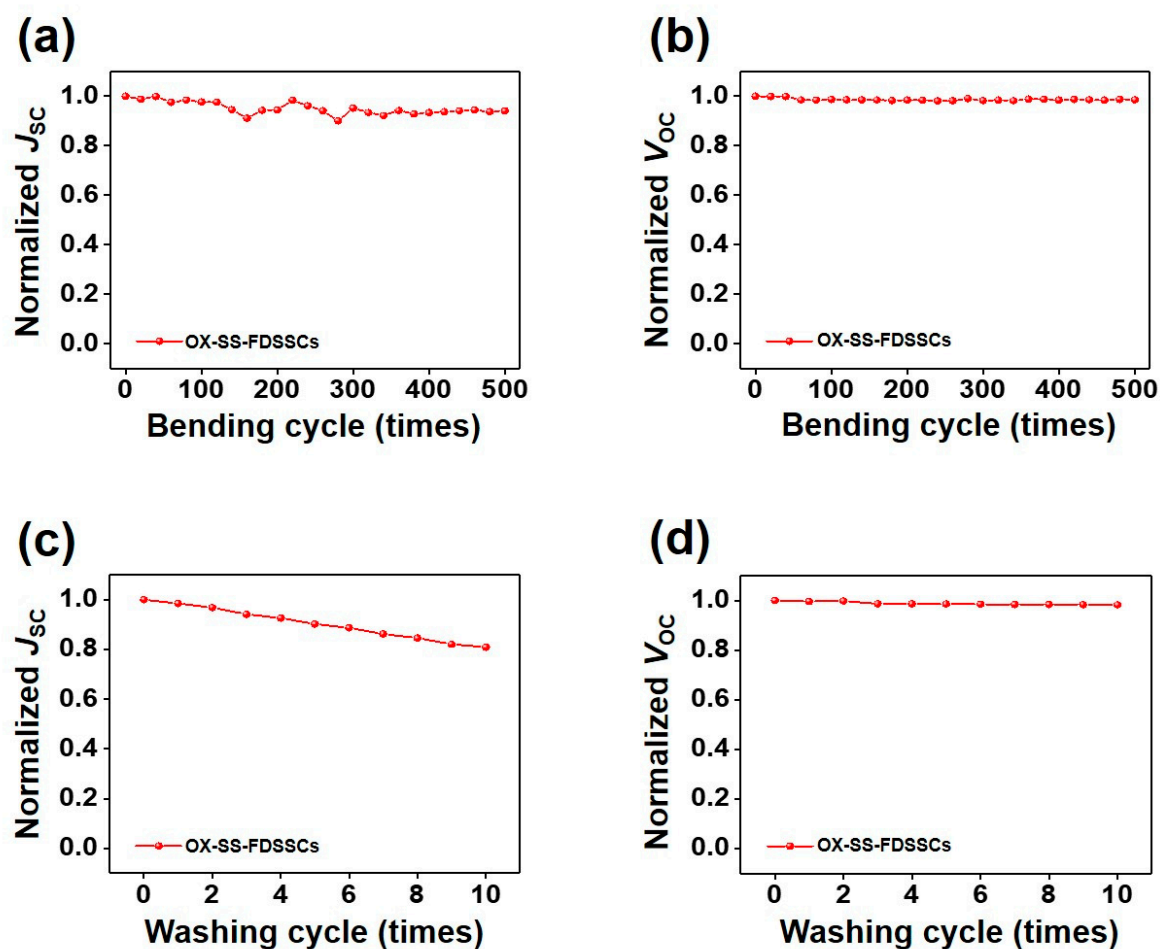

**Figure S8.** Normalized  $J_{sc}$  and  $V_{oc}$  of OX-enhanced SS-FDSSC as a function of (a) and (b) bending cycle, (c) and (d) washing cycle, respectively.

**Table S1.** EIS parameters of the SS-FDSSCs with TEMPO derivatives.

| Device   | $R_s$ ( $\Omega$ ) | $R_1$ ( $\Omega$ ) | $CPE_1$ (F)           | $R_2$ ( $\Omega$ ) | $CPE_2$ (F)           |
|----------|--------------------|--------------------|-----------------------|--------------------|-----------------------|
| Pristine | 25.0               | 41.5               | $3.36 \times 10^{-6}$ | 116                | $1.13 \times 10^{-3}$ |
| OX       | 15.9               | 41.9               | $2.57 \times 10^{-6}$ | 104                | $1.38 \times 10^{-3}$ |
| OAC      | 17.2               | 48.1               | $2.80 \times 10^{-6}$ | 144                | $9.44 \times 10^{-4}$ |
| OBZ      | 19.9               | 39.3               | $2.87 \times 10^{-6}$ | 107                | $1.44 \times 10^{-3}$ |
